# Supplementary material
Source: Copernicus journal article supplement (doi:10.5194/essd-18-3289-2026)
Supplement: Supplementary file 1 [file essd-18-3289-2026-supplement.pdf]

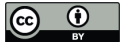

*Supplement of*

## **OasisMap30: a 30 m annual land cover dataset of China's oases from 1987 to 2024**

**Peng Chen et al.**

*Correspondence to:* Qiang Tang (qiangtang@swu.edu.cn)

The copyright of individual parts of the supplement might differ from the article licence.

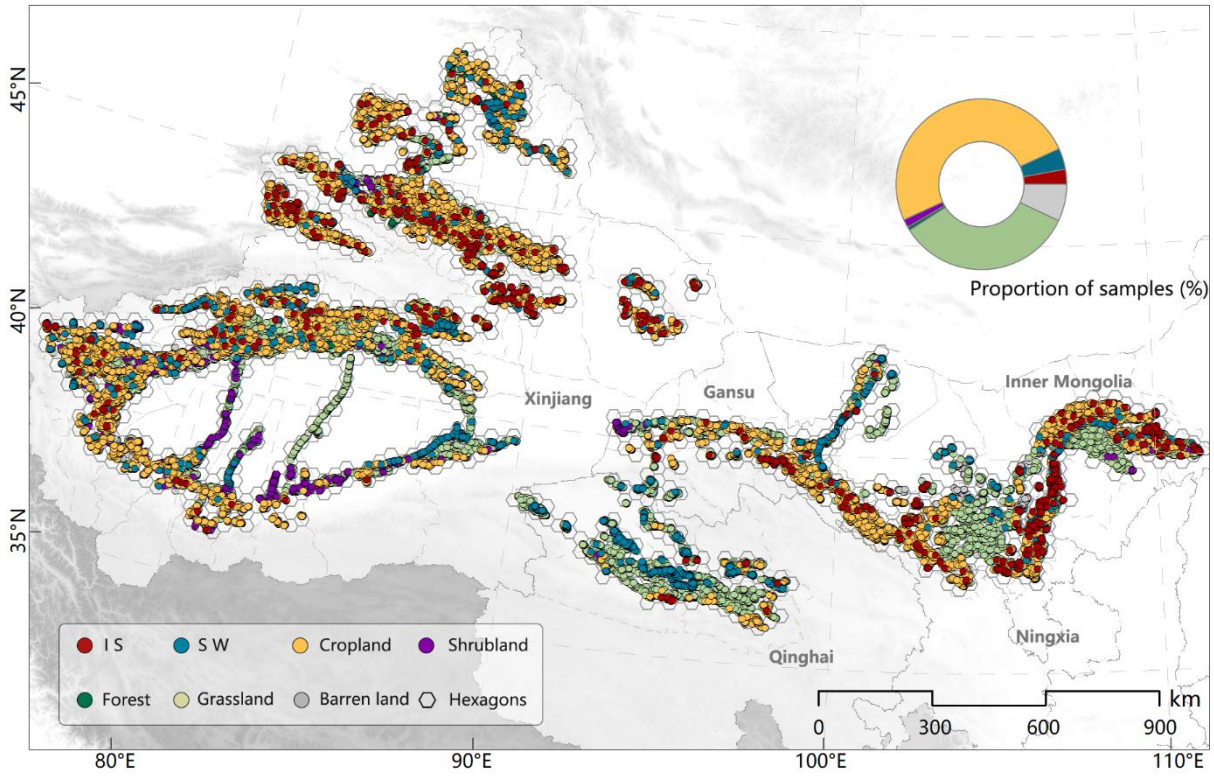

**Figure S1:** Spatial distribution of validation samples (taking the year 2024 as an example).

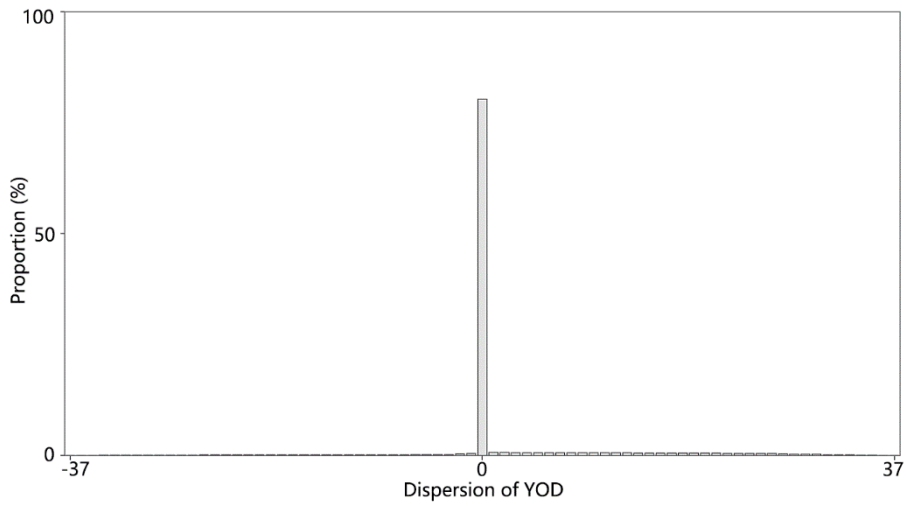

**Figure S2:** Dispersion of YOD for each indicator based on Landtrendr.

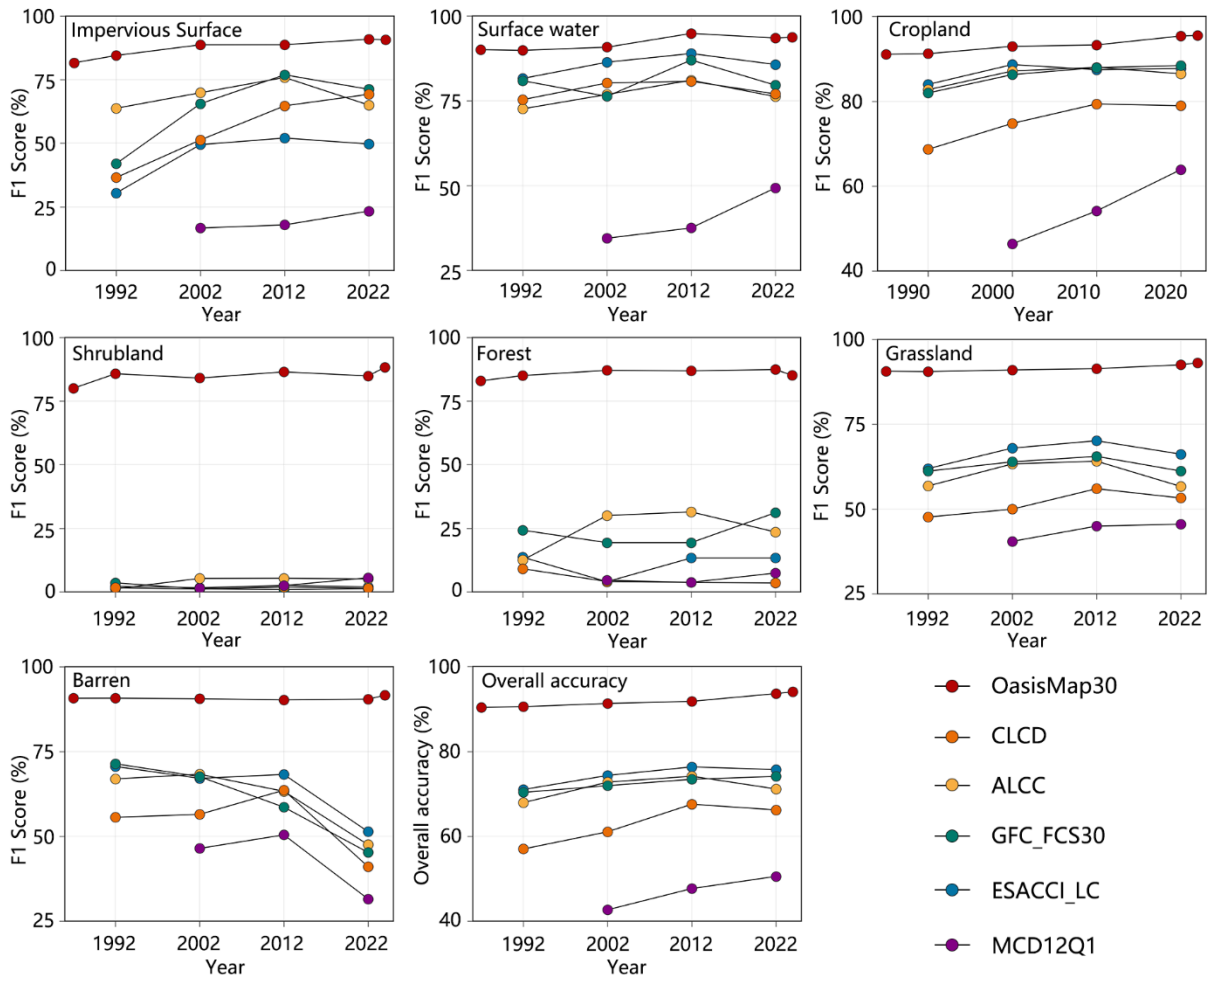

**Figure S3:** F1 score and overall accuracy for CLCD, ALCC, GLC\_FCS30, ESACCI\_LC, MCD12Q1 and OasisMap30 based on visually interpreted test samples.

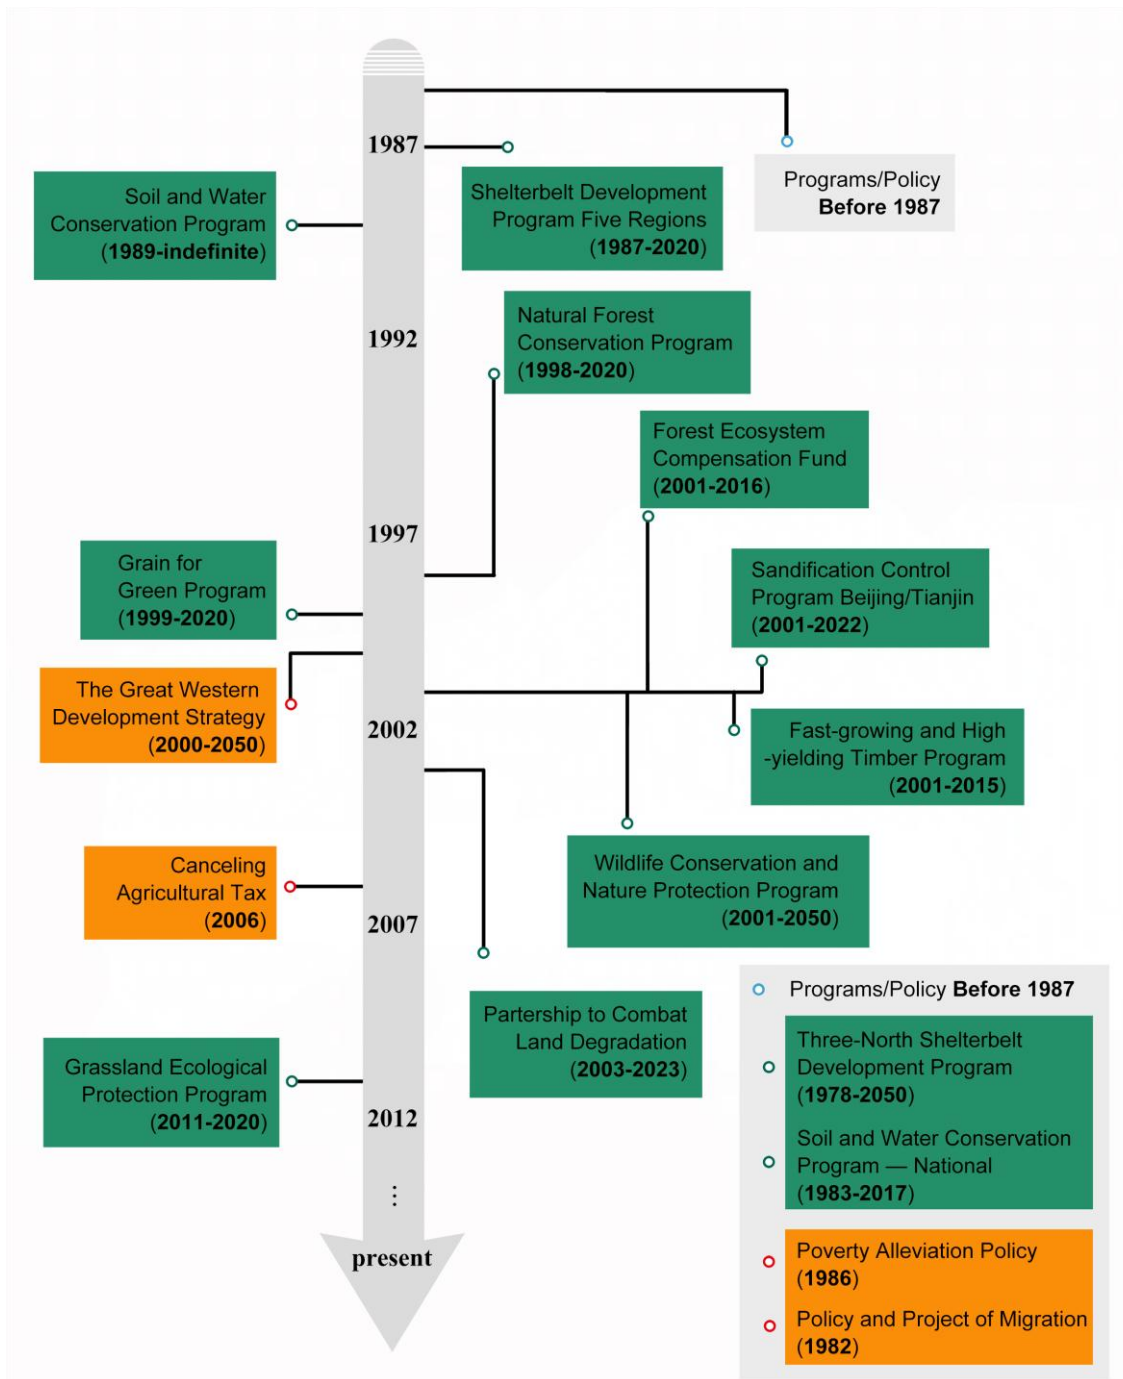

Figure S4: Major ecological projects and policies related to the Oasis region.

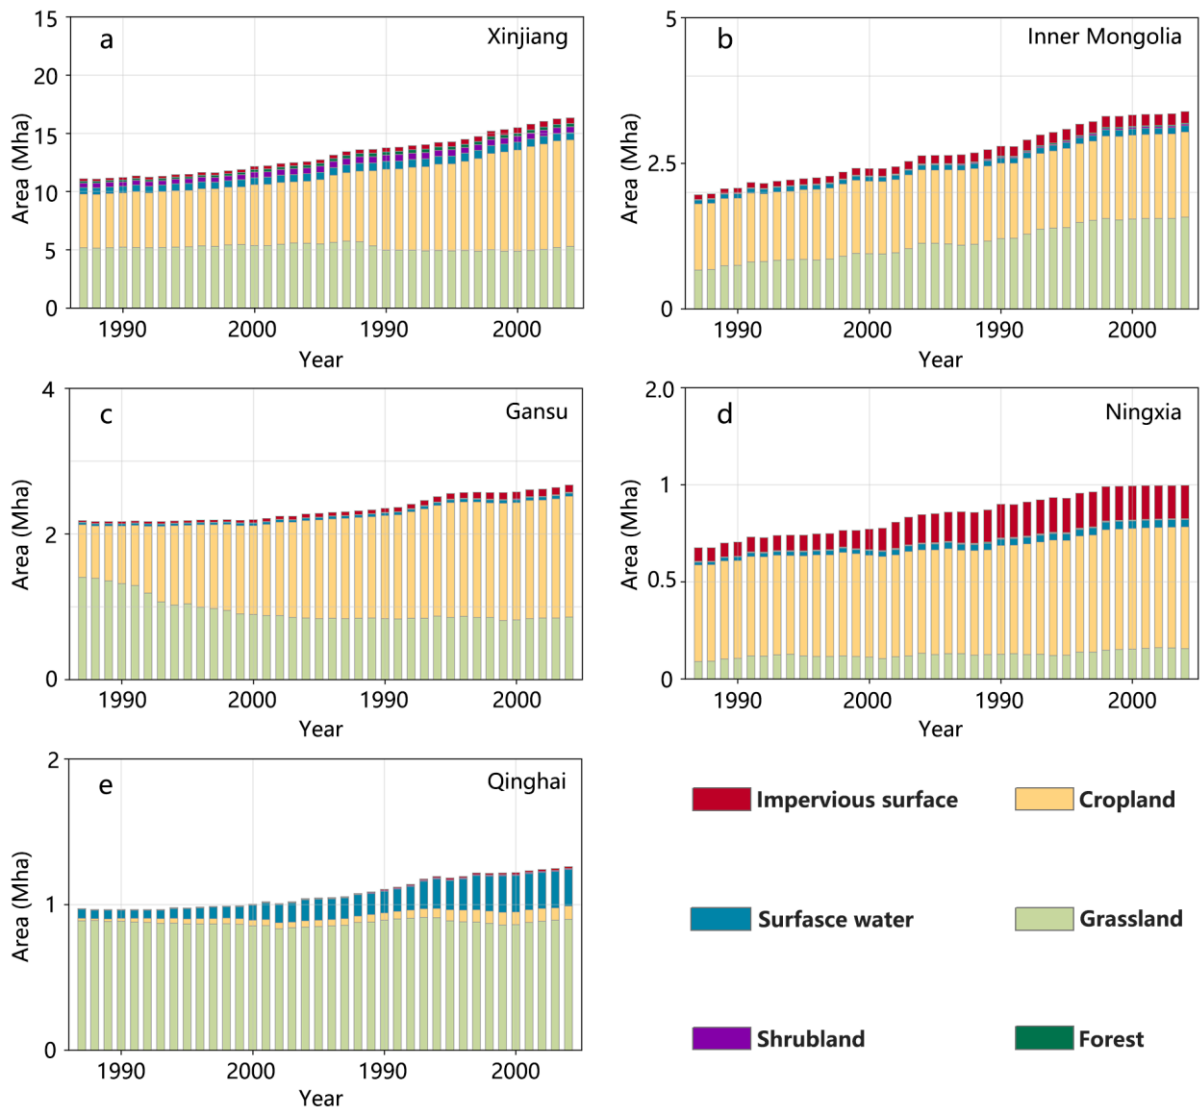

**Figure S5:** Changes in the spatial structure of oases at provincial/autonomous scales during 1987–2024.

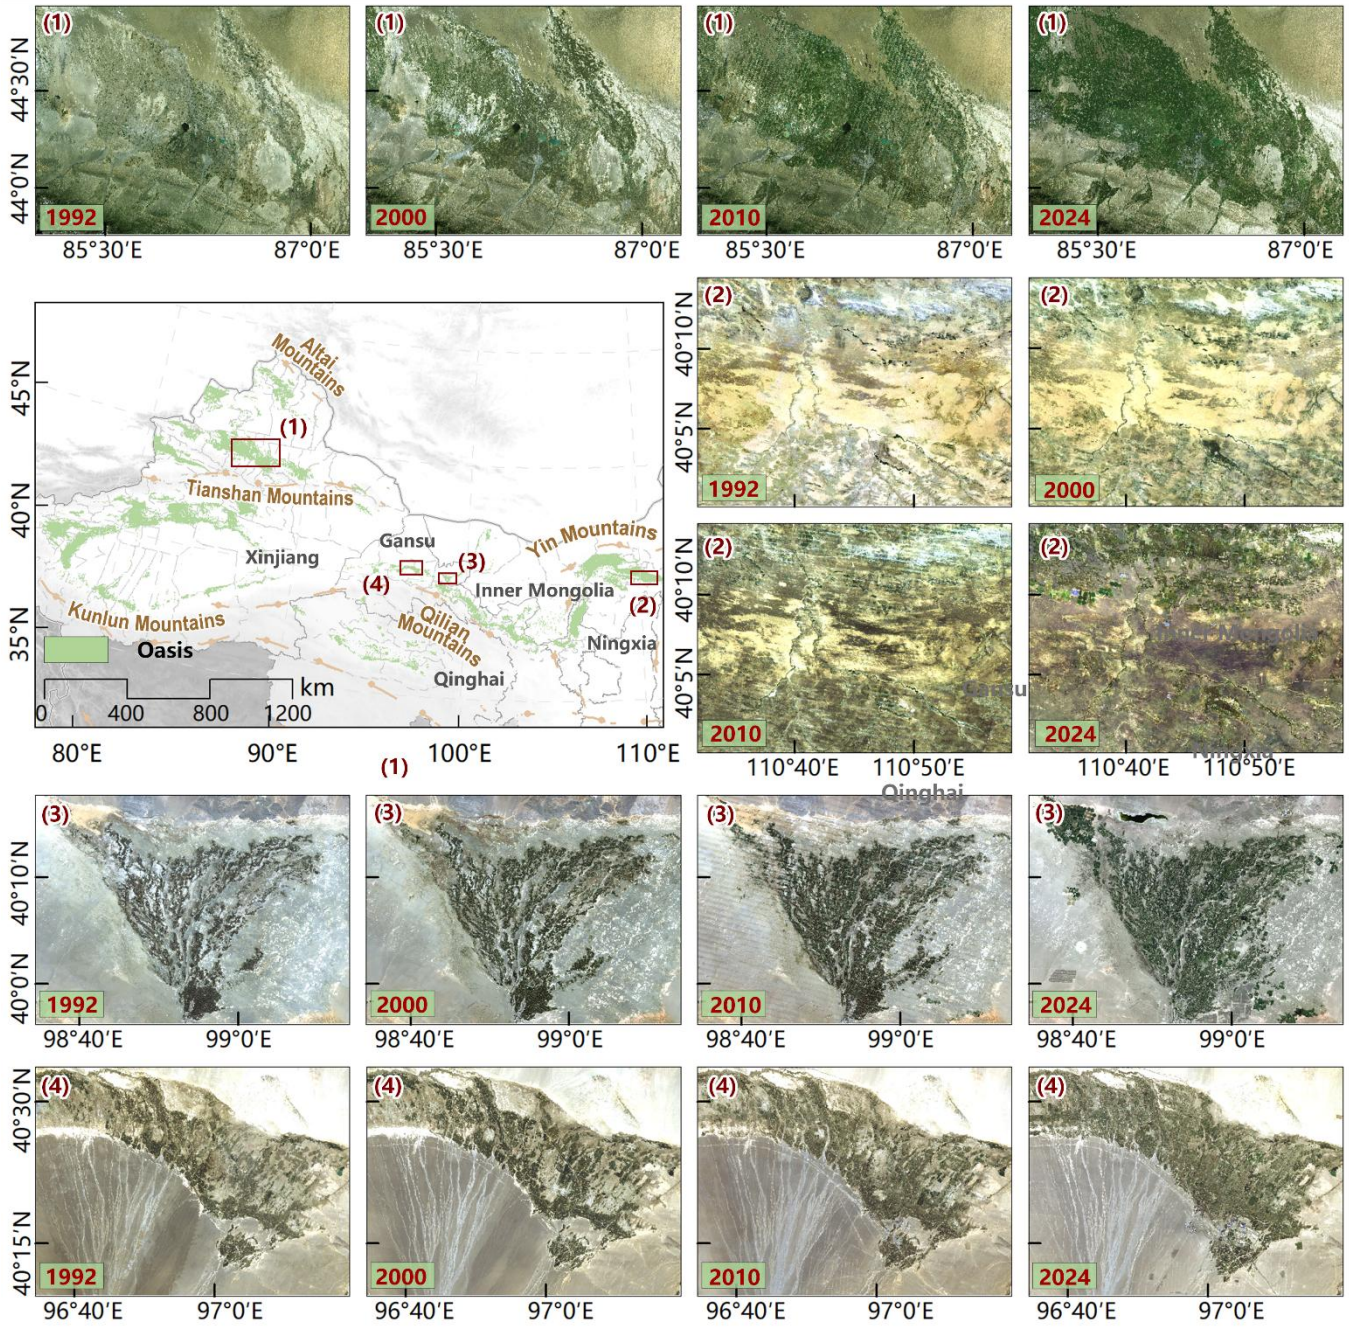

**Figure S6:** The Expansion Process of China's Oases. All the Landsat images are freely provided by USGS.

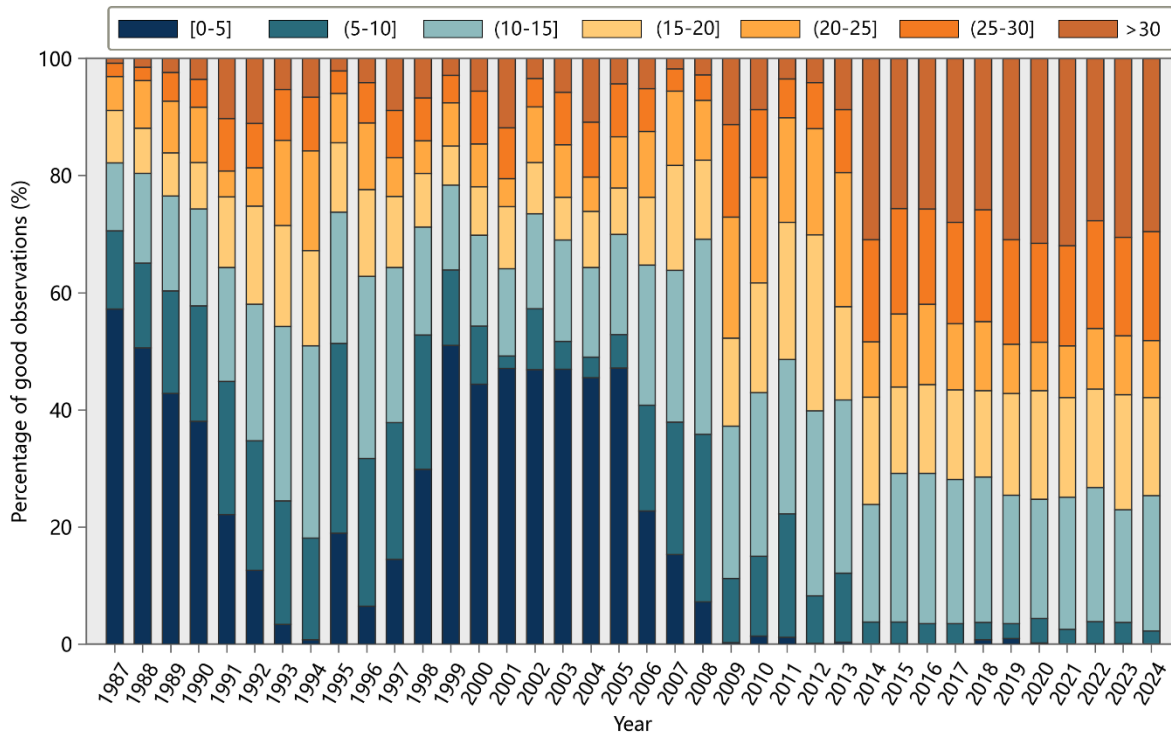

**Figure S7:** Percentage of good-quality observations during 1987–2024. Different colors indicate the number of Landsat images.

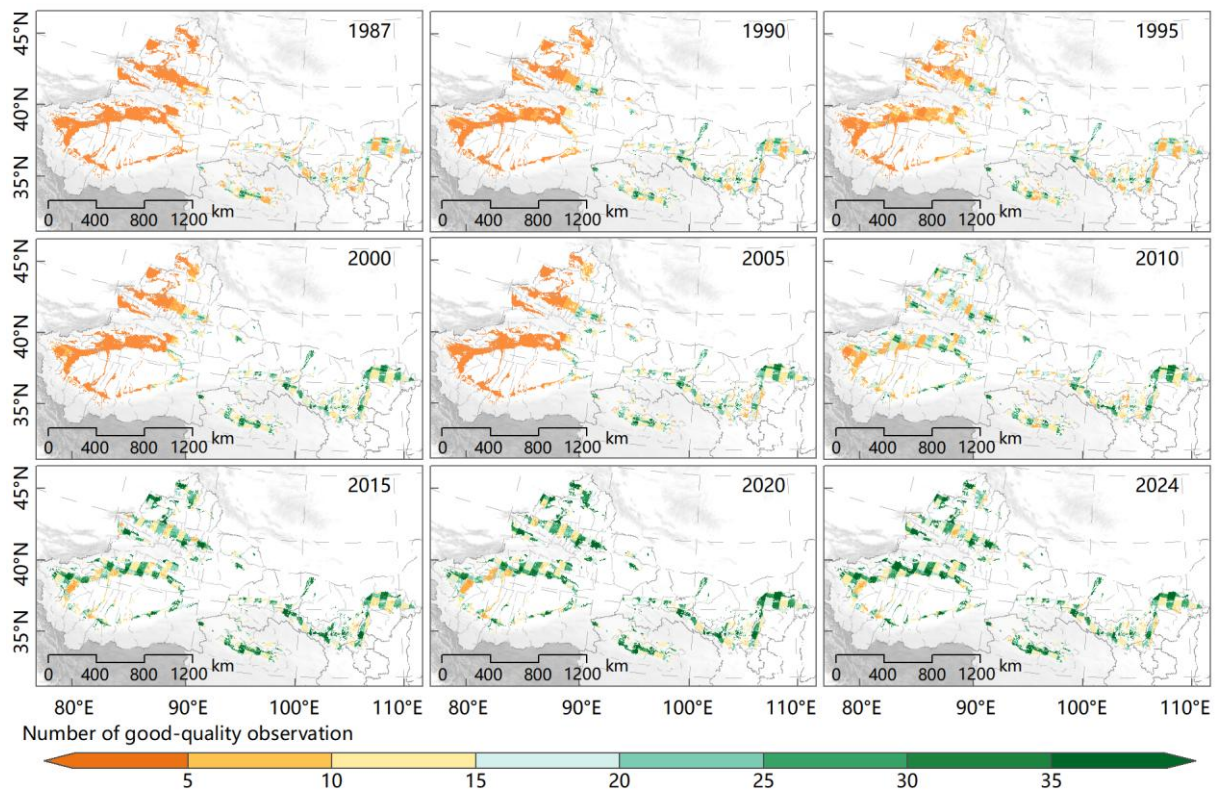

**Figure S8:** Spatial distribution of good-quality observations of Landsat data in China's oases.

**Table S1.** The features used for OasisMap30 mapping.

| Features                                                                                                                | Description                                                                                                                                                                                                                                                                                                                                                                                                                                                                                                                                                                                                                                                                                                                                                                                                                                                |
|-------------------------------------------------------------------------------------------------------------------------|------------------------------------------------------------------------------------------------------------------------------------------------------------------------------------------------------------------------------------------------------------------------------------------------------------------------------------------------------------------------------------------------------------------------------------------------------------------------------------------------------------------------------------------------------------------------------------------------------------------------------------------------------------------------------------------------------------------------------------------------------------------------------------------------------------------------------------------------------------|
| $\rho_{\text{Blue}}, \rho_{\text{Green}}, \rho_{\text{Red}}, \rho_{\text{Nir}}, \rho_{\text{SW11}}, \rho_{\text{SW12}}$ | 50th percentile value of surface reflectance derived from all available Landsat image.                                                                                                                                                                                                                                                                                                                                                                                                                                                                                                                                                                                                                                                                                                                                                                     |
| NDVI                                                                                                                    | $\text{NDVI} = (\rho_{\text{Nir}} - \rho_{\text{Red}}) / (\rho_{\text{Nir}} + \rho_{\text{Red}})$                                                                                                                                                                                                                                                                                                                                                                                                                                                                                                                                                                                                                                                                                                                                                          |
| MNDWI                                                                                                                   | $\text{MNDWI} = (\rho_{\text{Green}} - \rho_{\text{SW11}}) / (\rho_{\text{Green}} + \rho_{\text{SW11}})$                                                                                                                                                                                                                                                                                                                                                                                                                                                                                                                                                                                                                                                                                                                                                   |
| NDBI                                                                                                                    | $\text{NDBI} = (\rho_{\text{SW11}} - \rho_{\text{Nir}}) / (\rho_{\text{SW11}} + \rho_{\text{Nir}})$                                                                                                                                                                                                                                                                                                                                                                                                                                                                                                                                                                                                                                                                                                                                                        |
| Wetness                                                                                                                 | <p>for Landsat 5 TM:<br/> <math>\text{Wetness} = 0.1509 \times \rho_{\text{Blue}} + 0.1973 \times \rho_{\text{Green}} + 0.3279 \times \rho_{\text{Red}} + 0.3406 \times \rho_{\text{Nir}} - 0.7112 \times \rho_{\text{SW11}} - 0.4572 \times \rho_{\text{SW12}}</math></p> <p>for Landsat 7 ETM+:<br/> <math>\text{Wetness} = 0.2626 \times \rho_{\text{Blue}} + 0.2141 \times \rho_{\text{Green}} + 0.0926 \times \rho_{\text{Red}} + 0.0656 \times \rho_{\text{Nir}} - 0.7629 \times \rho_{\text{SW11}} - 0.5388 \times \rho_{\text{SW12}}</math></p> <p>for Landsat 8 OLI:<br/> <math>\text{Wetness} = 0.1511 \times \rho_{\text{Blue}} + 0.1973 \times \rho_{\text{Green}} + 0.3283 \times \rho_{\text{Red}} + 0.3407 \times \rho_{\text{Nir}} - 0.7117 \times \rho_{\text{SW11}} - 0.4559 \times \rho_{\text{SW12}}</math></p>                        |
| Soil brightness                                                                                                         | <p>for Landsat 5 TM:<br/> <math>\text{Soil brightness} = 0.3037 \times \rho_{\text{Blue}} + 0.2793 \times \rho_{\text{Green}} + 0.4743 \times \rho_{\text{Red}} + 0.5585 \times \rho_{\text{Nir}} + 0.5082 \times \rho_{\text{SW11}} + 0.1863 \times \rho_{\text{SW12}}</math></p> <p>for Landsat 7 ETM+:<br/> <math>\text{Soil brightness} = 0.3561 \times \rho_{\text{Blue}} + 0.3972 \times \rho_{\text{Green}} + 0.3904 \times \rho_{\text{Red}} + 0.6966 \times \rho_{\text{Nir}} + 0.2286 \times \rho_{\text{SW11}} + 0.1596 \times \rho_{\text{SW12}}</math></p> <p>for Landsat 8 OLI:<br/> <math>\text{Soil brightness} = 0.3029 \times \rho_{\text{Blue}} + 0.2786 \times \rho_{\text{Green}} + 0.4733 \times \rho_{\text{Red}} + 0.5599 \times \rho_{\text{Nir}} + 0.508 \times \rho_{\text{SW11}} + 0.1872 \times \rho_{\text{SW12}}</math></p> |
| Greenness                                                                                                               | <p>for Landsat 5 TM:<br/> <math>\text{Greenness} = -0.2848 \times \rho_{\text{Blue}} - 0.243 \times \rho_{\text{Green}} - 0.5436 \times \rho_{\text{Red}} + 0.7243 \times \rho_{\text{Nir}} + 0.0840 \times \rho_{\text{SW11}} - 0.1800 \times \rho_{\text{SW12}}</math></p> <p>for Landsat 7 ETM+:<br/> <math>\text{Greenness} = -0.3344 \times \rho_{\text{Blue}} - 0.3544 \times \rho_{\text{Green}} - 0.4556 \times \rho_{\text{Red}} + 0.6966 \times \rho_{\text{Nir}} - 0.0242 \times \rho_{\text{SW11}} - 0.2630 \times \rho_{\text{SW12}}</math></p> <p>for Landsat 8 OLI:<br/> <math>\text{Greenness} = -0.2941 \times \rho_{\text{Blue}} - 0.243 \times \rho_{\text{Green}} + 0.5424 \times \rho_{\text{Red}} + 0.7276 \times \rho_{\text{Nir}} + 0.0713 \times \rho_{\text{SW11}} - 0.1608 \times \rho_{\text{SW12}}</math></p>                 |
| Elevation, Slope, Aspect, and Hillshade                                                                                 | Elevation, Slope, Aspect, and Hillshade calculated from SRTM elevation.                                                                                                                                                                                                                                                                                                                                                                                                                                                                                                                                                                                                                                                                                                                                                                                    |

**Table S2.** LandTrendr parameter settings

| Parameter              | Setting | Description                                                                                                                                                      |
|------------------------|---------|------------------------------------------------------------------------------------------------------------------------------------------------------------------|
| maxSegments            | 8       | Maximum number of segments to be fitted on the time series                                                                                                       |
| spikeThreshold         | 0.9     | Threshold for dampening the spikes (1.0 means no dampening)                                                                                                      |
| vertexCountOvershoot   | 3       | The initial model can overshoot the maxSegments + 1 vertices by this amount. Later, it will be pruned down to maxSegments + 1                                    |
| preventOneYearRecovery | ture    | Prevent segments that represent one year recoveries                                                                                                              |
| recoveryThreshold      | 0.25    | If a segment has a recovery rate faster than 1/recoveryThreshold (in years), then the segment is disallowed                                                      |
| pvalThreshold          | 0.05    | If the p-value of the fitted model exceeds this threshold, then the current model is discarded and another one is fitted using the Levenberg-Marquardt optimizer |
| bestModelProportion    | 0.75    | Takes the model with most vertices that has a p-value that is at most this proportion away from the model with lowest p-value                                    |
| minObservationsNeeded  | 6       | Min observations needed to perform output fitting                                                                                                                |

**Table S3.** Cross-walking table between different datasets.

| Target type        |            |                     | Source type                                                                                                                                                                                                                                                                                                                                                                                                                                                                                                                                                               |                                                                                                                                                                                                                                                                                                                                                                                                                                                                                                                                                                                                                                                                                                                                                                                     |                                                                                                                                                                                  |
|--------------------|------------|---------------------|---------------------------------------------------------------------------------------------------------------------------------------------------------------------------------------------------------------------------------------------------------------------------------------------------------------------------------------------------------------------------------------------------------------------------------------------------------------------------------------------------------------------------------------------------------------------------|-------------------------------------------------------------------------------------------------------------------------------------------------------------------------------------------------------------------------------------------------------------------------------------------------------------------------------------------------------------------------------------------------------------------------------------------------------------------------------------------------------------------------------------------------------------------------------------------------------------------------------------------------------------------------------------------------------------------------------------------------------------------------------------|----------------------------------------------------------------------------------------------------------------------------------------------------------------------------------|
| OasisMap30         | CLCD       | ALLC                | GLC_FCS30                                                                                                                                                                                                                                                                                                                                                                                                                                                                                                                                                                 | ESACCI_LC                                                                                                                                                                                                                                                                                                                                                                                                                                                                                                                                                                                                                                                                                                                                                                           | MCD12Q1 (IGBP)                                                                                                                                                                   |
| Impervious surface | Impervious | Impervious surfaces | Impervious surface                                                                                                                                                                                                                                                                                                                                                                                                                                                                                                                                                        | Urban areas                                                                                                                                                                                                                                                                                                                                                                                                                                                                                                                                                                                                                                                                                                                                                                         | Urban and built-up lands                                                                                                                                                         |
| Surface water      | Water      | Water               | Water body                                                                                                                                                                                                                                                                                                                                                                                                                                                                                                                                                                | Water bodies                                                                                                                                                                                                                                                                                                                                                                                                                                                                                                                                                                                                                                                                                                                                                                        | Water bodies                                                                                                                                                                     |
| Cropland           | Cropland   | Cropland            | Rainfed cropland;<br>Herbaceous cover cropland;<br>Tree or shrub cover (Orchard) cropland;<br>Irrigated cropland;                                                                                                                                                                                                                                                                                                                                                                                                                                                         | Cropland, rainfed;<br>Cropland, irrigated or post-flooding;<br>Mosaic cropland (>50%) / natural vegetation (tree, shrub, herbaceous cover) (<50%);<br>Mosaic natural vegetation (tree, shrub, herbaceous cover) (>50%/cropland);                                                                                                                                                                                                                                                                                                                                                                                                                                                                                                                                                    | Croplands;<br>Cropland / natural vegetation mosaics;                                                                                                                             |
| Shrubland          | Shrub      | Shrubland           | Shrubland;<br>Evergreen shrubland;<br>Deciduous shrubland;<br>Sparse shrubland ( $fc < 0.15$ );                                                                                                                                                                                                                                                                                                                                                                                                                                                                           | Shrubland                                                                                                                                                                                                                                                                                                                                                                                                                                                                                                                                                                                                                                                                                                                                                                           | Closed shrublands;<br>Open shrublands;                                                                                                                                           |
| Forest             | Forest     | Forest              | Open evergreen broadleaved forest;<br>Closed evergreen broadleaved forest;<br>Open deciduous broadleaved forest ( $0.15 < fc < 0.4$ );<br>Closed deciduous broadleaved forest ( $fc > 0.4$ );<br>Open evergreen needle-leaved forest ( $0.15 < fc < 0.4$ );<br>Closed evergreen needle-leaved forest ( $fc > 0.4$ );<br>Open deciduous needle-leaved forest ( $0.15 < fc < 0.4$ );<br>Closed deciduous needle-leaved forest ( $0.15 < fc < 0.4$ );<br>Open mixed leaf forest (broadleaved and needle-leaved);<br>Closed mixed leaf forest (broadleaved and needle-leaved) | Tree cover, broadleaved, evergreen, closed to open (>15%);<br>Tree cover, broadleaved, deciduous, closed to open (>15%);<br>Tree cover, broadleaved, deciduous, closed (>40%);<br>Tree cover, broadleaved, deciduous, open (15-40%);<br>Tree cover, needleleaved, evergreen, closed to open (>15%);<br>Tree cover, needleleaved, evergreen, closed (>40%);<br>Tree cover, needleleaved, evergreen, open (15-40%);<br>Tree cover, needleleaved, deciduous, closed to open (>15%);<br>Tree cover, needleleaved, deciduous, closed (>40%);<br>Tree cover, needleleaved, deciduous, open (15-40%);<br>Tree cover, mixed leaf type (broadleaved and needleleaved);<br>Mosaic tree and shrub (>50%) / herbaceous cover (<50%);<br>Mosaic herbaceous cover (>50%) / tree and shrub (<50%); | Evergreen needleleaf forests;<br>Evergreen broadleaf forests;<br>Deciduous needleleaf forests;<br>Deciduous broadleaf forests;<br>Mixed forests;<br>Woody savannas;<br>Savannas; |
| Grassland          | Grassland  | Grassland           | Grassland;<br>Lichens and mosses;<br>Sparse vegetation ( $fc < 0.15$ );<br>Sparse herbaceous ( $fc < 0.15$ );                                                                                                                                                                                                                                                                                                                                                                                                                                                             | Grassland;<br>Sparse vegetation (tree, shrub, herbaceous cover) (<15%);<br>Lichens and mosses;                                                                                                                                                                                                                                                                                                                                                                                                                                                                                                                                                                                                                                                                                      | Grasslands                                                                                                                                                                       |
| Barren land        | Barren     | Bare land           | Bare areas;<br>Consolidated bare areas;<br>Unconsolidated bare areas;                                                                                                                                                                                                                                                                                                                                                                                                                                                                                                     | Bare areas                                                                                                                                                                                                                                                                                                                                                                                                                                                                                                                                                                                                                                                                                                                                                                          | Barren                                                                                                                                                                           |

**Table S4.** Pixel-wise accuracy of OasisMap30 calculated based on the annual visually interpreted samples.

| Year | OA    | Kappa |
|------|-------|-------|
| 1987 | 90.40 | 0.864 |
| 1988 | 90.43 | 0.865 |
| 1989 | 90.47 | 0.867 |
| 1990 | 90.45 | 0.868 |
| 1991 | 90.51 | 0.868 |
| 1992 | 90.55 | 0.866 |
| 1993 | 90.67 | 0.870 |
| 1994 | 90.71 | 0.872 |
| 1995 | 90.74 | 0.871 |
| 1996 | 90.82 | 0.875 |
| 1997 | 90.91 | 0.876 |
| 1998 | 91.03 | 0.878 |
| 1999 | 91.13 | 0.876 |
| 2000 | 91.12 | 0.877 |
| 2001 | 91.20 | 0.876 |
| 2002 | 91.32 | 0.877 |
| 2003 | 91.47 | 0.878 |
| 2004 | 91.43 | 0.879 |
| 2005 | 91.48 | 0.879 |
| 2006 | 91.59 | 0.880 |
| 2007 | 91.52 | 0.881 |
| 2008 | 91.63 | 0.882 |
| 2009 | 91.67 | 0.882 |
| 2010 | 91.72 | 0.882 |
| 2011 | 91.77 | 0.883 |
| 2012 | 91.82 | 0.883 |
| 2013 | 91.96 | 0.883 |
| 2014 | 91.85 | 0.883 |
| 2015 | 92.04 | 0.885 |
| 2016 | 92.38 | 0.886 |
| 2017 | 92.51 | 0.889 |
| 2018 | 92.90 | 0.891 |
| 2019 | 92.88 | 0.890 |
| 2020 | 93.09 | 0.893 |
| 2021 | 93.34 | 0.896 |
| 2022 | 93.64 | 0.899 |
| 2023 | 93.85 | 0.899 |
| 2024 | 94.05 | 0.902 |

Note: OA: overall accuracy; Kappa: Kappa coefficient.

**Table S5.** Comparison of mapping accuracy, area, uncertainty based on visually interpreted for OasisMap30, CLCD, ALCC, GLC\_FCS30, ESACCI\_LC, and MCD12Q1.

| Datasets   | LUCC        | 1992       |             | 2002       |             | 2012       |             | 2022       |             |
|------------|-------------|------------|-------------|------------|-------------|------------|-------------|------------|-------------|
|            |             | UA (%)     | Area (Mha)  |
| OasisMap30 | I S         | 83.65±6.6  | 0.41±0.042  | 87.85±5.89 | 0.6±0.045   | 87.93±4.59 | 0.8±0.05    | 90.86±4.08 | 0.96±0.051  |
|            | S W         | 90.37±4.25 | 0.75±0.047  | 90.28±4.09 | 0.9±0.049   | 93.93±3.14 | 1.01±0.041  | 93.66±2.91 | 1.09±0.047  |
|            | Cropland    | 93.3±1.09  | 7.33±0.137  | 93.52±1.00 | 8.38±0.131  | 93.18±0.95 | 10.5±0.141  | 95.76±0.68 | 12.81±0.133 |
|            | Shrubland   | 86.21±6.73 | 0.42±0.041  | 84.03±6.06 | 0.5±0.049   | 88.16±4.75 | 0.58±0.049  | 86.6±6.21  | 0.55±0.05   |
|            | Forest      | 87.18±9.67 | 0.17±0.027  | 88.1±9.19  | 0.25±0.031  | 86±9.1     | 0.3±0.035   | 88.24±8.31 | 0.29±0.034  |
|            | Grassland   | 90.02±1.21 | 8.16±0.149  | 90.85±1.17 | 8.27±0.145  | 91.6±1.14  | 8.11±0.144  | 91.78±1.13 | 8.48±0.134  |
|            | Barren land | 89.32±1.29 | 8.08±0.144  | 90.08±1.35 | 6.43±0.132  | 90.08±1.67 | 4.02±0.109  | 90.61±2.54 | 1.12±0.063  |
| CLCD       | I S         | 20.19±6.15 | 0.12±0.04   | 42.06±7.29 | 0.25±0.075  | 44.25±5.89 | 0.52±0.078  | 47.43±5.36 | 0.79±0.184  |
|            | S W         | 82.54±5.2  | 0.7±0.084   | 85.41±4.77 | 0.81±0.082  | 84.12±4.77 | 0.91±0.085  | 82.94±4.38 | 0.89±0.142  |
|            | Cropland    | 94.58±0.91 | 8.56±0.26   | 93.38±0.97 | 9.11±0.243  | 93.73±0.85 | 11.34±0.329 | 90.7±0.93  | 12.17±0.324 |
|            | Shrubland   | 1.15±1.29  | 0±0.012     | 0.84±1.16  | 0±0.003     | 1.32±1.48  | 0±0.003     | 1.03±1.42  | 0±0.016     |
|            | Forest      | 7.69±7.24  | 0.01±0.013  | 2.38±1.74  | 0.04±0.029  | 8±5.01     | 0.05±0.021  | 7.84±5.22  | 0.05±0.067  |
|            | Grassland   | 63.07±1.6  | 12.64±0.471 | 72.66±1.51 | 13.4±0.477  | 71.55±1.62 | 12.67±0.492 | 63.08±1.71 | 12.07±0.709 |
|            | Barren land | 64.54±1.83 | 18.77±0.438 | 60.42±2.02 | 17.18±0.447 | 62.56±2.46 | 15.29±0.464 | 59.61±3.02 | 14.84±0.692 |
| ALCC       | I S         | 62.5±7.54  | 0.4±0.069   | 61.68±8.32 | 0.78±0.084  | 71.26±6.07 | 0.97±0.084  | 88.57±3.38 | 1.09±0.184  |
|            | S W         | 88.56±3.81 | 0.76±0.103  | 91.36±3.3  | 0.92±0.108  | 88.79±3.66 | 0.85±0.113  | 94.05±2.34 | 0.83±0.293  |
|            | Cropland    | 96.65±0.71 | 11.23±0.25  | 96.06±0.74 | 11.15±0.241 | 96.06±0.68 | 12.28±0.3   | 87.89±1.04 | 13.42±0.396 |
|            | Shrubland   | 1.15±0.26  | 0.3±0.068   | 4.2±0.97   | 0.44±0.084  | 3.95±0.9   | 0.57±0.1    | 6.19±1     | 0.58±0.112  |
|            | Forest      | 7.69±5.12  | 0.16±0.023  | 21.43±9.03 | 0.15±0.031  | 22±8.74    | 0.16±0.032  | 19.61±6    | 0.18±0.077  |
|            | Grassland   | 54.83±1.62 | 8.11±0.421  | 61.36±1.67 | 8.5±0.431   | 59.95±1.76 | 8.88±0.469  | 47.69±1.78 | 8.72±0.604  |
|            | Barren land | 59.06±1.87 | 18.07±0.407 | 62.71±1.99 | 17.1±0.417  | 60.23±2.34 | 15.31±0.463 | 62.88±2.74 | 14.24±0.651 |
| GLC_FCS30  | I S         | 41.35±6.21 | 0.4±0.091   | 71.03±6.73 | 0.78±0.119  | 76.44±5.56 | 0.97±0.088  | 72±5.6     | 1.09±0.14   |
|            | S W         | 77.72±5.83 | 0.76±0.077  | 77.3±5.25  | 0.92±0.125  | 82.72±4.86 | 0.85±0.097  | 71.04±5.34 | 0.83±0.103  |
|            | Cropland    | 94.19±0.92 | 11.23±0.272 | 91.13±1.09 | 11.15±0.263 | 93.14±0.9  | 12.28±0.294 | 93.42±0.79 | 13.42±0.294 |
|            | Shrubland   | 2.3±0.91   | 0.3±0.048   | 0.84±0.24  | 0.44±0.078  | 0.66±0.15  | 0.57±0.12   | 1.03±0.26  | 0.58±0.208  |
|            | Forest      | 30.77±6.53 | 0.16±0.069  | 21.43±5.26 | 0.15±0.064  | 18±4.93    | 0.16±0.053  | 27.45±7.43 | 0.18±0.049  |
|            | Grassland   | 57.83±1.69 | 8.11±0.398  | 61.55±1.68 | 8.5±0.416   | 64.42±1.69 | 8.88±0.486  | 52.97±1.81 | 8.72±0.657  |
|            | Barren land | 67.09±1.78 | 18.07±0.395 | 66.71±1.85 | 17.1±0.418  | 55.5±2.29  | 15.31±0.472 | 60.26±2.7  | 14.24±0.66  |
| ESACCI_LC  | I S         | 24.04±7.26 | 0.08±0.03   | 37.38±8.37 | 0.11±0.034  | 50±7.15    | 0.24±0.035  | 66.86±5.93 | 0.55±0.094  |
|            | S W         | 77.11±5.5  | 0.79±0.095  | 81.09±5.04 | 0.83±0.092  | 74.3±5.52  | 0.86±0.08   | 73.02±4.96 | 0.92±0.142  |
|            | Cropland    | 81.45±1.39 | 10.96±0.401 | 86.49±1.18 | 12.12±0.385 | 88.37±1.06 | 13.45±0.371 | 82.03±1.16 | 13.64±0.442 |
|            | Shrubland   | 1.15±0.38  | 0.37±0.074  | 0.84±0.21  | 0.37±0.103  | 1.32±0.33  | 0.37±0.128  | 1.03±0.33  | 0.37±0.165  |
|            | Forest      | 5.13±4.9   | 0.03±0.021  | 2.38±1.88  | 0.03±0.031  | 2±2.24     | 0.03±0.027  | 1.96±1.7   | 0.04±0.023  |
|            | Grassland   | 46.06±1.49 | 12.31±0.457 | 47.55±1.53 | 12.92±0.455 | 52.86±1.66 | 13.17±0.472 | 49.86±1.61 | 13.26±0.636 |
|            | Barren land | 50.44±1.71 | 16.26±0.435 | 51.26±1.88 | 14.42±0.416 | 60.86±2.33 | 12.69±0.416 | 48.25±2.74 | 12.02±0.591 |
| MCD12Q1    | I S         | /          | /           | 14.95±2.95 | 0.42±0.095  | 13.79±2.6  | 0.43±0.081  | 20±3.15    | 0.44±0.112  |
|            | S W         | /          | /           | 24.87±4.69 | 0.49±0.091  | 26.64±4.74 | 0.46±0.095  | 34.53±5.48 | 0.48±0.1    |
|            | Cropland    | /          | /           | 35.19±1.67 | 4.86±0.274  | 43.63±1.63 | 6.79±0.317  | 53.76±1.53 | 8.19±0.404  |
|            | Shrubland   | /          | /           | 0.84±0.42  | 0.12±0.044  | 1.32±0.85  | 0.04±0.038  | 3.09±1.89  | 0.06±0.091  |
|            | Forest      | /          | /           | 2.38±4.61  | 0.001±0.013 | 2±2.74     | 0.001±0.019 | 3.92±5.33  | 0.001±0.013 |
|            | Grassland   | /          | /           | 49.46±1.24 | 14.51±0.524 | 53.64±1.34 | 14.4±0.543  | 51.89±1.36 | 14.41±0.707 |
|            | Barren land | /          | /           | 51.09±1.55 | 17.36±0.515 | 63.54±1.82 | 15.63±0.533 | 57.64±2.11 | 14.18±0.707 |

Note: 95% confidence intervals were used to estimate uncertainty. I S: Impervious surface; S W: Surface water.

**Table S6.** Confusion matrix of OasisMap30 in 1987 based on visually-interpreted test samples.

| Ground<br>Reference | Classification |       |          |           |        |           |             | Sum  | UA (%)      |
|---------------------|----------------|-------|----------|-----------|--------|-----------|-------------|------|-------------|
|                     | I S            | S W   | Cropland | Shrubland | Forest | Grassland | Barren land |      |             |
| I S                 | 82             | 0     | 6        | 2         | 0      | 4         | 5           | 99   | 82.83       |
| S W                 | 1              | 149   | 2        | 1         | 0      | 4         | 10          | 167  | 89.22       |
| Cropland            | 2              | 4     | 1617     | 3         | 3      | 42        | 98          | 1769 | 91.41       |
| Shrubland           | 3              | 0     | 7        | 72        | 1      | 2         | 3           | 88   | 81.82       |
| Forest              | 1              | 0     | 2        | 2         | 34     | 0         | 0           | 39   | 87.18       |
| Grassland           | 6              | 5     | 104      | 9         | 5      | 1901      | 93          | 2123 | 89.54       |
| Barren land         | 7              | 6     | 44       | 3         | 0      | 121       | 1897        | 2078 | 91.29       |
| Sum                 | 102            | 164   | 1782     | 92        | 43     | 2074      | 2106        | 6363 | Kappa= 0.86 |
| PA (%)              | 80.39          | 90.85 | 90.74    | 78.26     | 79.07  | 91.66     | 90.08       |      | OA= 90.40%  |

Note: I S: Impervious surface; S W: Surface water.

**Table S7.** Confusion matrix of OasisMap30 in 1992 based on visually-interpreted test samples.

| Ground<br>Reference | Classification |       |          |           |        |           |             | Sum  | UA (%)     |
|---------------------|----------------|-------|----------|-----------|--------|-----------|-------------|------|------------|
|                     | I S            | S W   | Cropland | Shrubland | Forest | Grassland | Barren land |      |            |
| I S                 | 87             | 3     | 4        | 1         | 0      | 4         | 5           | 104  | 83.65      |
| S W                 | 0              | 150   | 4        | 0         | 0      | 8         | 4           | 166  | 90.36      |
| Cropland            | 4              | 2     | 1670     | 3         | 3      | 61        | 47          | 1790 | 93.30      |
| Shrub               | 1              | 0     | 4        | 75        | 0      | 6         | 1           | 87   | 86.21      |
| Forest              | 0              | 0     | 2        | 1         | 34     | 2         | 0           | 39   | 87.18      |
| Grassland           | 2              | 6     | 93       | 8         | 4      | 1921      | 99          | 2134 | 90.02      |
| Barren land         | 8              | 6     | 94       | 0         | 0      | 110       | 1824        | 2042 | 89.32      |
| Sum                 | 102            | 167   | 1871     | 88        | 41     | 2112      | 1981        | 6362 | Kappa=0.87 |
| PA (%)              | 85.29          | 89.82 | 89.26    | 85.23     | 82.93  | 90.96     | 92.07       |      | OA=90.55%  |

Note: I S: Impervious surface; S W: Surface water.

**Table S8.** Confusion matrix of OasisMap30 in 2002 based on visually-interpreted test samples.

| Ground<br>Reference | Classification |       |          |           |        |           |             | Sum  | UA (%)     |
|---------------------|----------------|-------|----------|-----------|--------|-----------|-------------|------|------------|
|                     | I S            | S W   | Cropland | Shrubland | Forest | Grassland | Barren land |      |            |
| I S                 | 94             | 1     | 4        | 1         | 0      | 1         | 6           | 107  | 87.85      |
| S W                 | 1              | 167   | 3        | 2         | 0      | 5         | 7           | 185  | 90.27      |
| Cropland            | 1              | 0     | 1993     | 2         | 1      | 90        | 44          | 2131 | 93.52      |
| Shrub               | 2              | 0     | 7        | 100       | 1      | 7         | 2           | 119  | 84.03      |
| Forest              | 0              | 0     | 1        | 2         | 37     | 2         | 0           | 42   | 88.10      |
| Grassland           | 2              | 7     | 83       | 8         | 3      | 1947      | 93          | 2143 | 90.85      |
| Barren land         | 5              | 8     | 66       | 4         | 1      | 85        | 1534        | 1703 | 90.08      |
| Sum                 | 105            | 183   | 2157     | 119       | 43     | 2137      | 1686        | 6430 | Kappa=0.88 |
| PA (%)              | 89.52          | 91.26 | 92.40    | 84.03     | 86.05  | 91.11     | 90.98       |      | OA=91.32%  |

Note: I S: Impervious surface; S W: Surface water.

**Table S9.** Confusion matrix of OasisMap30 in 2012 based on visually-interpreted test samples.

| Ground<br>Reference | Classification |       |          |           |        |           |             | Sum  | UA (%)     |
|---------------------|----------------|-------|----------|-----------|--------|-----------|-------------|------|------------|
|                     | I S            | S W   | Cropland | Shrubland | Forest | Grassland | Barren land |      |            |
| I S                 | 153            | 0     | 3        | 0         | 0      | 3         | 15          | 174  | 87.93      |
| S W                 | 1              | 201   | 4        | 1         | 0      | 2         | 5           | 214  | 93.93      |
| Cropland            | 3              | 3     | 2364     | 3         | 1      | 125       | 38          | 2537 | 93.18      |
| Shrub               | 2              | 0     | 7        | 134       | 0      | 7         | 2           | 152  | 88.16      |
| Forest              | 0              | 1     | 1        | 1         | 43     | 4         | 0           | 50   | 86.00      |
| Grassland           | 4              | 4     | 101      | 13        | 3      | 1887      | 48          | 2060 | 91.60      |
| Barren land         | 8              | 1     | 51       | 6         | 2      | 43        | 1008        | 1119 | 90.08      |
| Sum                 | 171            | 210   | 2531     | 158       | 49     | 2071      | 1116        | 6306 | Kappa=0.88 |
| PA (%)              | 89.47          | 95.71 | 93.40    | 84.81     | 87.76  | 91.12     | 90.32       |      | OA=91.82%  |

Note: I S: Impervious surface; S W: Surface water.

**Table S10.** Confusion matrix of OasisMap30 in 2022 based on visually-interpreted test samples.

| Ground Reference | Classification |       |          |           |        |           |             | Sum  | UA (%)     |
|------------------|----------------|-------|----------|-----------|--------|-----------|-------------|------|------------|
|                  | I S            | S W   | Cropland | Shrubland | Forest | Grassland | Barren land |      |            |
| I S              | 159            | 0     | 3        | 1         | 0      | 5         | 7           | 175  | 90.86      |
| S W              | 0              | 236   | 7        | 1         | 0      | 7         | 1           | 252  | 93.65      |
| Cropland         | 4              | 3     | 3069     | 4         | 2      | 107       | 16          | 3205 | 95.76      |
| Shrub            | 0              | 1     | 10       | 84        | 1      | 1         | 0           | 97   | 86.60      |
| Forest           | 0              | 1     | 3        | 0         | 45     | 2         | 0           | 51   | 88.24      |
| Grassland        | 9              | 10    | 121      | 9         | 4      | 1944      | 21          | 2118 | 91.78      |
| Barren land      | 3              | 2     | 16       | 2         | 0      | 20        | 415         | 458  | 90.61      |
| Sum              | 175            | 253   | 3229     | 101       | 52     | 2086      | 460         | 6356 | Kappa=0.90 |
| PA (%)           | 90.86          | 93.28 | 95.04    | 83.17     | 86.54  | 93.19     | 90.22       |      | OA=93.64%  |

Note: I S: Impervious surface; S W: Surface water.

**Table S11.** Confusion matrix of OasisMap30 in 2024 based on visually-interpreted test samples.

| Ground Reference | Classification |       |          |           |        |           |             | Sum  | UA (%)     |
|------------------|----------------|-------|----------|-----------|--------|-----------|-------------|------|------------|
|                  | I S            | S W   | Cropland | Shrubland | Forest | Grassland | Barren land |      |            |
| I S              | 199            | 1     | 8        | 2         | 2      | 5         | 4           | 221  | 90.05      |
| S W              | 0              | 230   | 0        | 1         | 0      | 17        | 1           | 249  | 92.37      |
| Cropland         | 4              | 1     | 3113     | 7         | 1      | 142       | 0           | 3268 | 95.26      |
| Shrub            | 2              | 1     | 6        | 124       | 2      | 5         | 0           | 140  | 88.57      |
| Forest           | 0              | 0     | 7        | 1         | 57     | 2         | 0           | 67   | 85.07      |
| Grassland        | 6              | 9     | 114      | 6         | 4      | 2141      | 4           | 2284 | 93.70      |
| Barren land      | 7              | 0     | 2        | 0         | 0      | 3         | 114         | 126  | 90.48      |
| Sum              | 218            | 242   | 3250     | 141       | 66     | 2315      | 123         | 6355 | Kappa=0.90 |
| PA (%)           | 91.28          | 95.04 | 95.78    | 87.94     | 86.36  | 92.48     | 92.68       |      | OA=94.05%  |

Note: I S: Impervious surface; S W: Surface water.

**Table S12.** Confusion matrix of CLCD in 1992 based on visually-interpreted test samples.

| Ground<br>Reference | Classification |       |          |           |        |           |             | Sum  | UA (%)     |
|---------------------|----------------|-------|----------|-----------|--------|-----------|-------------|------|------------|
|                     | I S            | S W   | Cropland | Shrubland | Forest | Grassland | Barren land |      |            |
| I S                 | 21             | 0     | 29       | 0         | 0      | 35        | 19          | 104  | 20.19      |
| S W                 | 0              | 137   | 5        | 0         | 0      | 16        | 8           | 166  | 82.53      |
| Cropland            | 2              | 0     | 1693     | 0         | 2      | 90        | 3           | 1790 | 94.58      |
| Shrub               | 1              | 0     | 35       | 1         | 0      | 48        | 2           | 87   | 1.15       |
| Forest              | 0              | 1     | 26       | 2         | 3      | 7         | 0           | 39   | 7.69       |
| Grassland           | 10             | 26    | 408      | 1         | 0      | 1346      | 343         | 2134 | 63.07      |
| Barren land         | 0              | 6     | 46       | 0         | 0      | 672       | 1318        | 2042 | 64.54      |
| Sum                 | 34             | 170   | 2242     | 4         | 5      | 2214      | 1693        | 6362 | Kappa=0.58 |
| PA (%)              | 61.76          | 80.59 | 75.51    | 25.00     | 60.00  | 60.79     | 77.85       |      | OA=71.03%  |

Note: I S: Impervious surface; S W: Surface water.

**Table S13.** Confusion matrix of CLCD in 2002 based on visually-interpreted test samples.

| Ground<br>Reference | Classification |       |          |           |        |           |             | Sum  | UA (%)     |
|---------------------|----------------|-------|----------|-----------|--------|-----------|-------------|------|------------|
|                     | I S            | S W   | Cropland | Shrubland | Forest | Grassland | Barren land |      |            |
| I S                 | 45             | 0     | 15       | 0         | 0      | 37        | 10          | 107  | 42.06      |
| S W                 | 0              | 158   | 7        | 0         | 0      | 8         | 12          | 185  | 85.41      |
| Cropland            | 2              | 0     | 1990     | 0         | 1      | 132       | 6           | 2131 | 93.38      |
| Shrub               | 1              | 5     | 30       | 1         | 1      | 75        | 6           | 119  | 0.84       |
| Forest              | 0              | 0     | 26       | 2         | 1      | 13        | 0           | 42   | 2.38       |
| Grassland           | 23             | 8     | 248      | 0         | 5      | 1557      | 302         | 2143 | 72.66      |
| Barren land         | 4              | 10    | 42       | 0         | 0      | 618       | 1029        | 1703 | 60.42      |
| Sum                 | 75             | 181   | 2358     | 3         | 8      | 2440      | 1365        | 6430 | Kappa=0.63 |
| PA (%)              | 60.00          | 87.29 | 84.39    | 33.33     | 12.50  | 63.81     | 75.38       |      | OA=74.35%  |

Note: I S: Impervious surface; S W: Surface water.

**Table S14.** Confusion matrix of CLCD in 2012 based on visually-interpreted test samples.

| Ground<br>Reference | Classification |       |          |           |        |           |             | Sum  | UA (%)     |
|---------------------|----------------|-------|----------|-----------|--------|-----------|-------------|------|------------|
|                     | I S            | S W   | Cropland | Shrubland | Forest | Grassland | Barren land |      |            |
| I S                 | 77             | 0     | 17       | 0         | 0      | 62        | 18          | 174  | 44.25      |
| S W                 | 1              | 180   | 9        | 0         | 0      | 11        | 13          | 214  | 84.11      |
| Cropland            | 4              | 0     | 2378     | 0         | 2      | 150       | 3           | 2537 | 93.73      |
| Shrub               | 9              | 2     | 33       | 2         | 2      | 98        | 6           | 152  | 1.32       |
| Forest              | 2              | 0     | 25       | 2         | 4      | 17        | 0           | 50   | 8.00       |
| Grassland           | 29             | 2     | 360      | 0         | 2      | 1474      | 193         | 2060 | 71.55      |
| Barren land         | 0              | 7     | 79       | 0         | 0      | 333       | 700         | 1119 | 62.56      |
| Sum                 | 122            | 191   | 2901     | 4         | 10     | 2145      | 933         | 6306 | Kappa=0.65 |
| PA (%)              | 63.11          | 94.24 | 81.97    | 50.00     | 40.00  | 68.72     | 75.03       |      | OA=76.36%  |

Note: I S: Impervious surface; S W: Surface water.

**Table S15.** Confusion matrix of CLCD in 2022 based on visually-interpreted test samples.

| Ground Reference | Classification |       |          |           |        |           |             | Sum  | UA (%)     |
|------------------|----------------|-------|----------|-----------|--------|-----------|-------------|------|------------|
|                  | I S            | S W   | Cropland | Shrubland | Forest | Grassland | Barren land |      |            |
| I S              | 83             | 1     | 9        | 0         | 0      | 63        | 19          | 175  | 47.43      |
| S W              | 8              | 209   | 4        | 0         | 0      | 17        | 14          | 252  | 82.94      |
| Cropland         | 7              | 3     | 2907     | 0         | 1      | 282       | 5           | 3205 | 90.70      |
| Shrub            | 7              | 0     | 36       | 1         | 0      | 52        | 1           | 97   | 1.03       |
| Forest           | 2              | 2     | 34       | 0         | 4      | 9         | 0           | 51   | 7.84       |
| Grassland        | 46             | 17    | 421      | 2         | 3      | 1336      | 293         | 2118 | 63.08      |
| Barren land      | 6              | 4     | 12       | 0         | 1      | 162       | 273         | 458  | 59.61      |
| Sum              | 159            | 236   | 3423     | 3         | 9      | 1921      | 605         | 6356 | Kappa=0.61 |
| PA (%)           | 52.20          | 88.56 | 84.93    | 33.33     | 44.44  | 69.55     | 45.12       |      | OA=75.72%  |

Note: I S: Impervious surface; S W: Surface water.

**Table S16.** Confusion matrix of ALCC in 1992 based on visually-interpreted test samples.

| Ground<br>Reference | Classification |       |          |           |        |           |             | Sum  | UA (%)     |
|---------------------|----------------|-------|----------|-----------|--------|-----------|-------------|------|------------|
|                     | I S            | S W   | Cropland | Shrubland | Forest | Grassland | Barren land |      |            |
| I S                 | 65             | 2     | 19       | 1         | 0      | 10        | 7           | 104  | 62.50      |
| S W                 | 0              | 147   | 5        | 0         | 0      | 9         | 5           | 166  | 88.55      |
| Cropland            | 9              | 3     | 1730     | 0         | 0      | 43        | 5           | 1790 | 96.65      |
| Shrub               | 3              | 3     | 39       | 1         | 1      | 39        | 1           | 87   | 1.15       |
| Forest              | 2              | 1     | 23       | 0         | 3      | 8         | 2           | 39   | 7.69       |
| Grassland           | 19             | 67    | 469      | 68        | 5      | 1170      | 336         | 2134 | 54.83      |
| Barren land         | 2              | 16    | 107      | 3         | 0      | 708       | 1206        | 2042 | 59.06      |
| Sum                 | 100            | 239   | 2392     | 73        | 9      | 1987      | 1562        | 6362 | Kappa=0.55 |
| PA (%)              | 65.00          | 61.51 | 72.32    | 1.37      | 33.33  | 58.88     | 77.21       |      | OA=67.93%  |

Note: I S: Impervious surface; S W: Surface water.

**Table S17.** Confusion matrix of ALCC in 2002 based on visually-interpreted test samples.

| Ground<br>Reference | Classification |       |          |           |        |           |             | Sum  | UA (%)     |
|---------------------|----------------|-------|----------|-----------|--------|-----------|-------------|------|------------|
|                     | I S            | S W   | Cropland | Shrubland | Forest | Grassland | Barren land |      |            |
| I S                 | 66             | 0     | 14       | 0         | 0      | 22        | 5           | 107  | 61.68      |
| S W                 | 0              | 169   | 6        | 0         | 0      | 3         | 7           | 185  | 91.35      |
| Cropland            | 7              | 3     | 2047     | 0         | 1      | 67        | 6           | 2131 | 96.06      |
| Shrub               | 0              | 10    | 38       | 5         | 2      | 57        | 7           | 119  | 4.20       |
| Forest              | 0              | 0     | 19       | 3         | 9      | 11        | 0           | 42   | 21.43      |
| Grassland           | 7              | 57    | 373      | 53        | 6      | 1315      | 332         | 2143 | 61.36      |
| Barren land         | 2              | 16    | 70       | 9         | 0      | 538       | 1068        | 1703 | 62.71      |
| Sum                 | 82             | 255   | 2567     | 70        | 18     | 2013      | 1425        | 6430 | Kappa=0.61 |
| PA (%)              | 80.49          | 66.27 | 79.74    | 7.14      | 50.00  | 65.33     | 74.95       |      | OA=72.77%  |

Note: I S: Impervious surface; S W: Surface water.

**Table S18.** Confusion matrix of ALCC in 2012 based on visually-interpreted test samples.

| Ground<br>Reference | Classification |       |          |           |        |           |             | Sum  | UA (%)     |
|---------------------|----------------|-------|----------|-----------|--------|-----------|-------------|------|------------|
|                     | I S            | S W   | Cropland | Shrubland | Forest | Grassland | Barren land |      |            |
| I S                 | 124            | 1     | 14       | 0         | 0      | 26        | 9           | 174  | 71.26      |
| S W                 | 0              | 190   | 7        | 0         | 0      | 8         | 9           | 214  | 88.79      |
| Cropland            | 8              | 3     | 2437     | 0         | 2      | 81        | 6           | 2537 | 96.06      |
| Shrub               | 1              | 7     | 38       | 6         | 2      | 85        | 13          | 152  | 3.95       |
| Forest              | 0              | 3     | 17       | 3         | 11     | 15        | 1           | 50   | 22.00      |
| Grassland           | 19             | 40    | 406      | 55        | 5      | 1235      | 300         | 2060 | 59.95      |
| Barren land         | 1              | 11    | 81       | 8         | 0      | 344       | 674         | 1119 | 60.23      |
| Sum                 | 153            | 255   | 3000     | 72        | 20     | 1794      | 1012        | 6306 | Kappa=0.62 |
| PA (%)              | 81.05          | 74.51 | 81.23    | 8.33      | 55.00  | 68.84     | 66.60       |      | OA=74.17%  |

Note: I S: Impervious surface; S W: Surface water.

**Table S19.** Confusion matrix of ALCC in 2022 based on visually-interpreted test samples.

| Ground<br>Reference | Classification |       |          |           |        |           |             | Sum  | UA (%)     |
|---------------------|----------------|-------|----------|-----------|--------|-----------|-------------|------|------------|
|                     | I S            | S W   | Cropland | Shrubland | Forest | Grassland | Barren land |      |            |
| I S                 | 155            | 1     | 9        | 0         | 0      | 5         | 5           | 175  | 88.57      |
| S W                 | 2              | 237   | 4        | 0         | 0      | 3         | 6           | 252  | 94.05      |
| Cropland            | 76             | 4     | 2817     | 5         | 8      | 270       | 25          | 3205 | 87.89      |
| Shrub               | 1              | 5     | 32       | 6         | 5      | 41        | 7           | 97   | 6.19       |
| Forest              | 4              | 5     | 21       | 0         | 10     | 10        | 1           | 51   | 19.61      |
| Grassland           | 58             | 96    | 396      | 126       | 10     | 1010      | 422         | 2118 | 47.69      |
| Barren land         | 6              | 22    | 31       | 1         | 1      | 109       | 288         | 458  | 62.88      |
| Sum                 | 302            | 370   | 3310     | 138       | 34     | 1448      | 754         | 6356 | Kappa=0.56 |
| PA (%)              | 51.32          | 64.05 | 85.11    | 4.35      | 29.41  | 69.75     | 38.20       |      | OA=71.16%  |

Note: I S: Impervious surface; S W: Surface water.

**Table S20.** Confusion matrix of GLC\_FCS30 in 1992 based on visually-interpreted test samples.

| Ground Reference | Classification |       |          |           |        |           |             | Sum  | UA (%)     |
|------------------|----------------|-------|----------|-----------|--------|-----------|-------------|------|------------|
|                  | I S            | S W   | Cropland | Shrubland | Forest | Grassland | Barren land |      |            |
| I S              | 43             | 0     | 20       | 0         | 0      | 21        | 20          | 104  | 41.35      |
| S W              | 0              | 129   | 8        | 0         | 1      | 23        | 5           | 166  | 77.71      |
| Cropland         | 22             | 0     | 1686     | 0         | 13     | 62        | 7           | 1790 | 94.19      |
| Shrub            | 3              | 0     | 45       | 2         | 2      | 31        | 4           | 87   | 2.30       |
| Forest           | 3              | 0     | 12       | 0         | 12     | 12        | 0           | 39   | 30.77      |
| Grassland        | 24             | 15    | 420      | 19        | 31     | 1234      | 391         | 2134 | 57.83      |
| Barren land      | 6              | 9     | 133      | 4         | 1      | 519       | 1370        | 2042 | 67.09      |
| Sum              | 101            | 153   | 2324     | 25        | 60     | 1902      | 1797        | 6362 | Kappa=0.58 |
| PA (%)           | 42.57          | 84.31 | 72.55    | 8.00      | 20.00  | 64.88     | 76.24       |      | OA=70.36%  |

Note: I S: Impervious surface; S W: Surface water.

**Table S21.** Confusion matrix of GLC\_FCS30 in 2002 based on visually-interpreted test samples.

| Ground<br>Reference | Classification |       |          |           |        |           |             | Sum  | UA (%)     |
|---------------------|----------------|-------|----------|-----------|--------|-----------|-------------|------|------------|
|                     | I S            | S W   | Cropland | Shrubland | Forest | Grassland | Barren land |      |            |
| I S                 | 76             | 0     | 10       | 0         | 0      | 10        | 11          | 107  | 71.03      |
| S W                 | 0              | 143   | 0        | 0         | 0      | 38        | 4           | 185  | 77.30      |
| Cropland            | 7              | 0     | 1942     | 0         | 14     | 141       | 27          | 2131 | 91.13      |
| Shrub               | 2              | 2     | 48       | 1         | 4      | 49        | 13          | 119  | 0.84       |
| Forest              | 3              | 0     | 15       | 1         | 9      | 14        | 0           | 42   | 21.43      |
| Grassland           | 17             | 15    | 265      | 37        | 22     | 1319      | 468         | 2143 | 61.55      |
| Barren land         | 20             | 30    | 90       | 10        | 2      | 415       | 1136        | 1703 | 66.71      |
| Sum                 | 125            | 190   | 2370     | 49        | 51     | 1986      | 1659        | 6430 | Kappa=0.60 |
| PA (%)              | 60.80          | 75.26 | 81.94    | 2.04      | 17.65  | 66.41     | 68.47       |      | OA=71.94%  |

Note: I S: Impervious surface; S W: Surface water.

**Table S22.** Confusion matrix of GLC\_FCS30 in 2012 based on visually-interpreted test samples.

| Ground<br>Reference | Classification |       |          |           |        |           |             | Sum  | UA (%)     |
|---------------------|----------------|-------|----------|-----------|--------|-----------|-------------|------|------------|
|                     | I S            | S W   | Cropland | Shrubland | Forest | Grassland | Barren land |      |            |
| I S                 | 133            | 0     | 18       | 0         | 0      | 13        | 10          | 174  | 76.44      |
| S W                 | 1              | 177   | 3        | 0         | 0      | 29        | 4           | 214  | 82.71      |
| Cropland            | 4              | 0     | 2363     | 0         | 10     | 138       | 22          | 2537 | 93.14      |
| Shrub               | 6              | 3     | 54       | 1         | 4      | 62        | 22          | 152  | 0.66       |
| Forest              | 1              | 0     | 17       | 0         | 9      | 23        | 0           | 50   | 18.00      |
| Grassland           | 25             | 3     | 309      | 54        | 20     | 1327      | 322         | 2060 | 64.42      |
| Barren land         | 2              | 10    | 72       | 15        | 0      | 399       | 621         | 1119 | 55.50      |
| Sum                 | 172            | 193   | 2836     | 70        | 43     | 1991      | 1001        | 6306 | Kappa=0.61 |
| PA (%)              | 77.33          | 91.71 | 83.32    | 1.43      | 20.93  | 66.65     | 62.04       |      | OA=73.44%  |

Note: I S: Impervious surface; S W: Surface water.

**Table S23.** Confusion matrix of GLC\_FCS30 in 2022 based on visually-interpreted test samples.

| Ground Reference | Classification |       |          |           |        |           |             | Sum  | UA (%)     |
|------------------|----------------|-------|----------|-----------|--------|-----------|-------------|------|------------|
|                  | I S            | S W   | Cropland | Shrubland | Forest | Grassland | Barren land |      |            |
| I S              | 126            | 0     | 8        | 0         | 0      | 18        | 23          | 175  | 72.00      |
| S W              | 1              | 179   | 3        | 0         | 0      | 59        | 10          | 252  | 71.03      |
| Cropland         | 28             | 0     | 2994     | 1         | 10     | 138       | 34          | 3205 | 93.42      |
| Shrub            | 1              | 0     | 39       | 1         | 4      | 48        | 4           | 97   | 1.03       |
| Forest           | 1              | 2     | 23       | 0         | 14     | 11        | 0           | 51   | 27.45      |
| Grassland        | 19             | 15    | 488      | 48        | 11     | 1122      | 415         | 2118 | 52.97      |
| Barren land      | 3              | 2     | 12       | 11        | 0      | 154       | 276         | 458  | 60.26      |
| Sum              | 179            | 198   | 3567     | 61        | 39     | 1550      | 762         | 6356 | Kappa=0.59 |
| PA (%)           | 70.39          | 90.40 | 83.94    | 1.64      | 35.90  | 72.39     | 36.22       |      | OA=74.13%  |

Note: I S: Impervious surface; S W: Surface water.

**Table S24.** Confusion matrix of ESACCI\_LC in 1992 based on visually-interpreted test samples.

| Ground<br>Reference | Classification |       |          |           |        |           |             | Sum  | UA (%)     |
|---------------------|----------------|-------|----------|-----------|--------|-----------|-------------|------|------------|
|                     | I S            | S W   | Cropland | Shrubland | Forest | Grassland | Barren land |      |            |
| I S                 | 25             | 2     | 22       | 0         | 0      | 45        | 10          | 104  | 24.04      |
| S W                 | 0              | 128   | 8        | 0         | 0      | 14        | 16          | 166  | 77.11      |
| Cropland            | 2              | 0     | 1458     | 0         | 3      | 219       | 108         | 1790 | 81.45      |
| Shrub               | 1              | 3     | 38       | 1         | 0      | 35        | 9           | 87   | 1.15       |
| Forest              | 1              | 0     | 16       | 0         | 2      | 18        | 2           | 39   | 5.13       |
| Grassland           | 4              | 32    | 600      | 26        | 0      | 983       | 489         | 2134 | 46.06      |
| Barren land         | 0              | 9     | 314      | 9         | 0      | 680       | 1030        | 2042 | 50.44      |
| Sum                 | 33             | 174   | 2456     | 36        | 5      | 1994      | 1664        | 6362 | Kappa=0.39 |
| PA (%)              | 75.76          | 73.56 | 59.36    | 2.78      | 40.00  | 49.30     | 61.90       |      | OA=57.01%  |

Note: I S: Impervious surface; S W: Surface water.

**Table S25.** Confusion matrix of ESACCI\_LC in 2002 based on visually-interpreted test samples.

| Ground<br>Reference | Classification |       |          |           |        |           |             | Sum  | UA (%)     |
|---------------------|----------------|-------|----------|-----------|--------|-----------|-------------|------|------------|
|                     | I S            | S W   | Cropland | Shrubland | Forest | Grassland | Barren land |      |            |
| I S                 | 40             | 1     | 26       | 0         | 0      | 35        | 5           | 107  | 37.38      |
| S W                 | 0              | 150   | 6        | 1         | 0      | 17        | 11          | 185  | 81.08      |
| Cropland            | 4              | 3     | 1843     | 0         | 2      | 223       | 56          | 2131 | 86.49      |
| Shrub               | 0              | 5     | 45       | 1         | 0      | 54        | 14          | 119  | 0.84       |
| Forest              | 2              | 1     | 18       | 4         | 1      | 14        | 2           | 42   | 2.38       |
| Grassland           | 2              | 17    | 638      | 36        | 3      | 1019      | 428         | 2143 | 47.55      |
| Barren land         | 1              | 12    | 221      | 20        | 1      | 575       | 873         | 1703 | 51.26      |
| Sum                 | 49             | 189   | 2797     | 62        | 7      | 1937      | 1389        | 6430 | Kappa=0.44 |
| PA (%)              | 81.63          | 79.37 | 65.89    | 1.61      | 14.29  | 52.61     | 62.85       |      | OA=61.07%  |

Note: I S: Impervious surface; S W: Surface water.

**Table S26.** Confusion matrix of ESACCI\_LC in 2012 based on visually-interpreted test samples.

| Ground<br>Reference | Classification |       |          |           |        |           |             | Sum  | UA (%)     |
|---------------------|----------------|-------|----------|-----------|--------|-----------|-------------|------|------------|
|                     | I S            | S W   | Cropland | Shrubland | Forest | Grassland | Barren land |      |            |
| I S                 | 87             | 1     | 45       | 0         | 0      | 37        | 4           | 174  | 50.00      |
| S W                 | 0              | 159   | 11       | 2         | 0      | 26        | 16          | 214  | 74.30      |
| Cropland            | 3              | 3     | 2242     | 2         | 2      | 254       | 31          | 2537 | 88.37      |
| Shrub               | 0              | 2     | 49       | 2         | 0      | 76        | 23          | 152  | 1.32       |
| Forest              | 1              | 1     | 23       | 1         | 1      | 20        | 3           | 50   | 2.00       |
| Grassland           | 4              | 10    | 661      | 31        | 0      | 1089      | 265         | 2060 | 52.86      |
| Barren land         | 0              | 4     | 81       | 23        | 1      | 329       | 681         | 1119 | 60.86      |
| Sum                 | 95             | 180   | 3112     | 61        | 4      | 1831      | 1023        | 6306 | Kappa=0.52 |
| PA (%)              | 91.58          | 88.33 | 72.04    | 3.28      | 25.00  | 59.48     | 66.57       |      | OA=67.57%  |

Note: I S: Impervious surface; S W: Surface water.

**Table S27.** Confusion matrix of ESACCI\_LC in 2022 based on visually-interpreted test samples.

| Ground Reference | Classification |       |          |           |        |           |             | Sum  | UA (%)     |
|------------------|----------------|-------|----------|-----------|--------|-----------|-------------|------|------------|
|                  | I S            | S W   | Cropland | Shrubland | Forest | Grassland | Barren land |      |            |
| I S              | 117            | 2     | 27       | 1         | 0      | 25        | 3           | 175  | 66.86      |
| S W              | 0              | 184   | 11       | 1         | 0      | 36        | 20          | 252  | 73.02      |
| Cropland         | 19             | 2     | 2629     | 6         | 3      | 490       | 56          | 3205 | 82.03      |
| Shrub            | 0              | 4     | 47       | 1         | 0      | 41        | 4           | 97   | 1.03       |
| Forest           | 4              | 1     | 28       | 0         | 1      | 16        | 1           | 51   | 1.96       |
| Grassland        | 22             | 28    | 675      | 21        | 2      | 1056      | 314         | 2118 | 49.86      |
| Barren land      | 1              | 5     | 37       | 9         | 0      | 185       | 221         | 458  | 48.25      |
| Sum              | 163            | 226   | 3454     | 39        | 6      | 1849      | 619         | 6356 | Kappa=0.46 |
| PA (%)           | 71.78          | 81.42 | 76.11    | 2.56      | 16.67  | 57.11     | 35.70       |      | OA=66.22%  |

Note: I S: Impervious surface; S W: Surface water.

**Table S28.** Confusion matrix of MCD12Q1 in 2002 based on visually-interpreted test samples.

| Ground<br>Reference | Classification |       |          |           |        |           |             | Sum  | UA (%)     |
|---------------------|----------------|-------|----------|-----------|--------|-----------|-------------|------|------------|
|                     | I S            | S W   | Cropland | Shrubland | Forest | Grassland | Barren land |      |            |
| I S                 | 16             | 0     | 42       | 0         | 0      | 29        | 20          | 107  | 14.95      |
| S W                 | 0              | 46    | 8        | 0         | 0      | 64        | 67          | 185  | 24.86      |
| Cropland            | 35             | 2     | 750      | 6         | 0      | 1132      | 206         | 2131 | 35.19      |
| Shrub               | 3              | 2     | 12       | 1         | 0      | 63        | 38          | 119  | 0.84       |
| Forest              | 1              | 0     | 9        | 0         | 1      | 19        | 12          | 42   | 2.38       |
| Grassland           | 20             | 24    | 199      | 8         | 1      | 1060      | 831         | 2143 | 49.46      |
| Barren land         | 10             | 8     | 83       | 1         | 0      | 731       | 870         | 1703 | 51.09      |
| Sum                 | 85             | 82    | 1103     | 16        | 2      | 3098      | 2044        | 6430 | Kappa=0.18 |
| PA (%)              | 18.82          | 56.10 | 68.00    | 6.25      | 50.00  | 34.22     | 42.56       |      | OA=42.67%  |

Note: I S: Impervious surface; S W: Surface water.

**Table S29.** Confusion matrix of MCD12Q1 in 2012 based on visually-interpreted test samples.

| Ground<br>Reference | Classification |       |          |           |        |           |             | Sum  | UA (%)     |
|---------------------|----------------|-------|----------|-----------|--------|-----------|-------------|------|------------|
|                     | I S            | S W   | Cropland | Shrubland | Forest | Grassland | Barren land |      |            |
| I S                 | 24             | 0     | 72       | 0         | 0      | 61        | 17          | 174  | 13.79      |
| S W                 | 1              | 57    | 21       | 0         | 0      | 83        | 52          | 214  | 26.64      |
| Cropland            | 45             | 3     | 1107     | 4         | 0      | 1173      | 205         | 2537 | 43.63      |
| Shrub               | 3              | 1     | 21       | 2         | 0      | 60        | 65          | 152  | 1.32       |
| Forest              | 1              | 0     | 10       | 0         | 1      | 27        | 11          | 50   | 2.00       |
| Grassland           | 18             | 24    | 268      | 3         | 2      | 1105      | 640         | 2060 | 53.64      |
| Barren land         | 2              | 5     | 53       | 1         | 0      | 347       | 711         | 1119 | 63.54      |
| Sum                 | 94             | 90    | 1552     | 10        | 3      | 2856      | 1701        | 6306 | Kappa=0.26 |
| PA (%)              | 25.53          | 63.33 | 71.33    | 20.00     | 33.33  | 38.69     | 41.80       |      | OA=47.68%  |

Note: I S: Impervious surface; S W: Surface water.

**Table S30.** Confusion matrix of MCD12Q1 in 2022 based on visually-interpreted test samples.

| Ground<br>Reference | Classification |       |          |           |        |           |             | Sum  | UA (%)     |
|---------------------|----------------|-------|----------|-----------|--------|-----------|-------------|------|------------|
|                     | I S            | S W   | Cropland | Shrubland | Forest | Grassland | Barren land |      |            |
| I S                 | 35             | 0     | 63       | 0         | 0      | 64        | 13          | 175  | 20.00      |
| S W                 | 0              | 87    | 26       | 0         | 0      | 69        | 70          | 252  | 34.52      |
| Cropland            | 67             | 2     | 1723     | 1         | 0      | 1233      | 179         | 3205 | 53.76      |
| Shrub               | 2              | 0     | 14       | 3         | 0      | 61        | 17          | 97   | 3.09       |
| Forest              | 3              | 0     | 18       | 0         | 2      | 24        | 4           | 51   | 3.92       |
| Grassland           | 16             | 10    | 317      | 5         | 1      | 1099      | 670         | 2118 | 51.89      |
| Barren land         | 2              | 2     | 27       | 2         | 0      | 161       | 264         | 458  | 57.64      |
| Sum                 | 125            | 101   | 2188     | 11        | 3      | 2711      | 1217        | 6356 | Kappa=0.26 |
| PA (%)              | 28.00          | 86.14 | 78.75    | 27.27     | 66.67  | 40.54     | 21.69       |      | OA=50.55%  |

Note: I S: Impervious surface; S W: Surface water.

**Table S31.** Comparison of mapping accuracy based on Geo-Wiki test samples for OasisMap30, CLCD, GLC\_FCS30, ESACCI\_LC, and MCD12Q1.

| Datasets   |        | Geo-Wiki |        |          |           |        |           |             | OA (%) |
|------------|--------|----------|--------|----------|-----------|--------|-----------|-------------|--------|
|            |        | I S      | S W    | Cropland | Shrubland | Forest | Grassland | Barren land |        |
| OasisMap30 | PA (%) | 52.43    | 100    | 83.16    | 43.75     | 72.00  | 53.87     | 87.80       | 74.36  |
|            | UA (%) | 83.08    | 97.09  | 77.94    | 9.59      | 36.73  | 78.04     | 79.70       |        |
|            | F1 (%) | 64.29    | 98.52  | 80.47    | 15.73     | 48.65  | 63.74     | 83.56       |        |
| CLCD       | PA (%) | 47.83    | 100.00 | 69.16    | 0.00      | 0.00   | 40.70     | 54.21       | 56.73  |
|            | UA (%) | 50.77    | 97.09  | 57.89    | 0.00      | 0.00   | 86.92     | 42.80       |        |
|            | F1 (%) | 49.25    | 98.52  | 63.03    | 0.00      | 0.00   | 55.44     | 47.84       |        |
| ALCC       | PA (%) | 55.26    | 91.74  | 66.58    | 0.00      | 75.00  | 52.63     | 65.20       | 64.31  |
|            | UA (%) | 64.62    | 97.09  | 61.90    | 0.00      | 6.12   | 65.42     | 82.29       |        |
|            | F1 (%) | 59.57    | 94.34  | 64.16    | 0.00      | 0.00   | 58.33     | 72.76       |        |
| GLC_FCS30  | PA (%) | 47.06    | 100.00 | 75.00    | 0.00      | 100.00 | 62.25     | 46.46       | 60.90  |
|            | UA (%) | 61.54    | 97.09  | 63.91    | 0.00      | 2.04   | 72.43     | 60.52       |        |
|            | F1 (%) | 53.33    | 98.52  | 69.01    | 0.00      | 4.00   | 66.95     | 52.56       |        |
| ESACCI_LC  | PA (%) | 62.50    | 100.00 | 52.23    | 0.00      | 100.00 | 28.09     | 57.62       | 50.85  |
|            | UA (%) | 23.08    | 97.09  | 67.42    | 0.00      | 2.04   | 42.52     | 44.65       |        |
|            | F1 (%) | 33.71    | 98.52  | 58.86    | 0.00      | 4.00   | 33.83     | 50.31       |        |
| MCD12Q1    | PA (%) | 32.34    | 0.00   | 75.07    | 0.00      | 0.00   | 13.19     | 52.17       | 50.09  |
|            | UA (%) | 100      | 0.00   | 70.93    | 0.00      | 0.00   | 11.21     | 79.70       |        |
|            | F1 (%) | 48.87    | 0.00   | 72.94    | 0.00      | 0.00   | 12.12     | 63.07       |        |

Note: I S: Impervious surface; S W: Surface water.
